# Supplementary material for: Selective HDAC6 inhibitor TubA offers neuroprotection after intracerebral hemorrhage via inhibiting neuronal apoptosis
Source: PeerJ. 2023 Apr 28;11:e15293. doi: 10.7717/peerj.15293 (PMC10150719; doi:10.7717/peerj.15293)
Supplement: Supplemental Information 4 [file peerj-11-15293-s004.xlsx]

## Sheet: Sheet1
Figure 1
	Sham	ICH-4h	ICH-6h	ICH-12h	ICH-1d	ICH-3d				Sham	ICH-4h	ICH-6h	ICH-12h	ICH-1d	ICH-3d
HDAC6/β-actin	0.06	0.06	0.13	0.17	0.41	0.49			Ace-α-tubulin/β-actin	0.4	0.26	0.33	0.18	0.12	0.12
	0.04	0.07	0.05	0.05	0.23	0.5				0.3	0.24	0.26	0.22	0.18	0.06
	0.02	0.05	0.12	0.2	0.34	0.37				0.38	0.39	0.38	0.31	0.2	0.14
N	3	3	3	3	3	3			N	3	3	3	3	3	3
Mean	0.04	0.06	0.1	0.14	0.32667	0.45333			Mean	0.36	0.29667	0.32333	0.23667	0.16667	0.10667
SEM	0.011547	0.005774	0.025166	0.045826	0.052387	0.041767			SEM	0.030551	0.047022	0.034801	0.038442	0.024037	0.024037
One-way anova									One-way anova
F=22.405	p<0.001								F=8.122	p=0.001
Bonferroni test									Bonferroni test
	Significant	Summary	P Value							Significant	Summary	P Value
sham vs. 4h	No	ns	1						sham vs. 4h	No	ns	1
sham vs. 6h	No	ns	1						sham vs. 6h	No	ns	1
sham vs. 12h	No	ns	1						sham vs. 12h	No	ns	0.378
sham vs. 1d	Yes	**	0.001						sham vs. 1d	Yes	*	0.026
sham vs. 3d	Yes	***	<0.001						sham vs. 3d	Yes	**	0.003
Figure 2
	control	hemin24h	hemin48h							control	hemin24h	hemin48h
HDAC6/β-actin	0.06	0.22	0.42						Ace-α-tubulin/β-actin	0.34	0.17	0.06
	0.06	0.18	0.41							0.26	0.19	0.07
	0.08	0.19	0.36							0.27	0.2	0.1
N	3	3	3						N	3	3	3
Mean	0.06667	0.19667	0.39667						Mean	0.29	0.18667	0.07667
SEM	0.006667	0.012019	0.018559						SEM	0.025166	0.008819	0.012019
One-way anova									One-way anova
F=155.438	p<0.001								F=39.909	p<0.001
Bonferroni test									Bonferroni test
	Significant	Summary	P Value							Significant	Summary	P Value
Control vs. Hemin (24h)	Yes	**	0.001						Control vs. Hemin (24h)	Yes	*	0.015
Control vs. Hemin (48h)	Yes	***	<0.001						Control vs. Hemin (48h)	Yes	***	<0.001
Figure 4a
	Sham	ICH+Vehicle	ICH+TubA(25mg/kg)	ICH+TubA(40mg/kg)						Sham	ICH+Vehicle	ICH+TubA(25mg/kg)	ICH+TubA(40mg/kg)
Modified Garcia Test(1d)	18	9	12	13					Modified Garcia Test(3d)	18	3	14	17
	18	12	12	12						18	12	12	15
	17	7	7	15						18	9	12	16
	17	10	9	15						17	9	9	16
	18	11	10	14						18	10	10	17
	18	12	7	16						18	11	10	15
	18	9	8	6						18	8	11	13
	17	11	10	15						17	9	13	12
	18	4	11	9						18	10	14	15
	18	6	13	13						18	10	9	14
N	10	10	10	10					N	10	10	10	10
Mean	17.7	9.1	9.9	13.8					Mean	17.8	9.1	11.4	15
SEM	0.152753	0.849183	0.674125	0.679869					SEM	0.133333	0.766667	0.6	0.516398
One-way anova									One-way anova
F=37.716	p<0.001								F=48.03	p<0.001
Games-Howell's test									Bonferroni test
	Significant	Summary	P Value							Significant	Summary	P Value
Sham vs. ICH+Vehicle(DMSO)	Yes	***	<0.001						Sham vs. ICH+Vehicle(DMSO)	Yes	***	<0.001
Sham vs. ICH+TubA(25mg/kg)	Yes	***	<0.001						Sham vs. ICH+TubA(25mg/kg)	Yes	***	<0.001
Sham vs. ICH+TubA(40mg/kg)	Yes	**	0.001						Sham vs. ICH+TubA(40mg/kg)	Yes	**	0.006
ICH+Vehicle(DMSO) vs. ICH+TubA(25mg/kg)	No	ns	0.881						ICH+Vehicle(DMSO) vs. ICH+TubA(25mg/kg)	Yes	#	0.035
ICH+Vehicle(DMSO) vs. ICH+TubA(40mg/kg)	Yes	##	0.002						ICH+Vehicle(DMSO) vs. ICH+TubA(40mg/kg)	Yes	###	<0.001
ICH+TubA(25mg/kg) vs. ICH+TubA(40mg/kg)	Yes	^^	0.004						ICH+TubA(25mg/kg) vs. ICH+TubA(40mg/kg)	Yes	^^^	<0.001
Figure 4c
	Control	Hemin+Vehicle(PBS)	Hemin+TubA	Hemin+NC-siRNA	Hemin+HDAC6 siRNA
cells viability (CCK8)	1	0.75974	0.83279	0.73488	0.83915
	1	0.74374	0.87635	0.80691	0.92498
	1	0.76514	0.85098	0.77553	0.86933
	1	0.81862	0.94925	0.82443	0.93208
N	4	4	4	4	4
Mean	1	0.771809	0.877341	0.785437	0.891383
SEM	0	0.0162513	0.025579	0.0196548	0.0223594
One-way anova
F=23.611	p<0.001
Bonferroni test
	Significant	Summary	P Value
Cont vs. Hemin+Vehicle(PBS)	Yes	***	<0.001
Cont vs. Hemin+TubA	Yes	**	0.004
Cont vs. Hemin+NC-siRNA	Yes	***	<0.001
Cont vs. Hemin+HDAC6 siRNA	Yes	*	0.011
Hemin+Vehicle(PBS) vs. Hemin+TubA	Yes	#	0.013
Hemin+Vehicle(PBS) vs. Hemin+NC-siRNA	No	ns	1
Hemin+Vehicle(PBS) vs. Hemin+HDAC6 siRNA	Yes	##	0.005
Hemin+TubA vs. Hemin+NC-siRNA	Yes	^	0.038
Hemin+TubA vs. Hemin+HDAC6 siRNA	No	ns	1
Hemin+NC-siRNA vs. Hemin+HDAC6 siRNA	Yes	+	0.013
Figure 5
	Sham	ICH+Vehicle	ICH+TubA(25mg/kg)	ICH+TubA(40mg/kg)						Sham	ICH+Vehicle	ICH+TubA(25mg/kg)	ICH+TubA(40mg/kg)
BWC(24h, Ipsi-BG)	79.4	82.5	82	80.1					BWC(72h, Ipsi-BG)	79.6	82.6	81.6	80.2
	79.3	82.7	81.2	79.8						79.5	82.3	80.5	79.6
	79.6	82.3	81.3	80.2						79.2	82.2	81.4	79.8
	79.5	82.3	79.8	80.4						79.8	83.1	81.9	80.2
	79.3	82.6	81.5	80.2						79.1	82.6	80.7	79.5
	79.4	82.7	80.9	80.3						79.5	82.5	81.3	79.7
	79.8	82.5	81.3	80.6						79.6	82.3	81.6	80.3
	79.5	82.8	81.1	79.8						79.4	82.5	82.2	80.7
	79.1	82.2	79.9	79.6						79.3	81.7	81.3	80.1
	79.6	82.3	81.7	80.2						79.4	82.3	80.4	79.8
N	10	10	10	10					N	10	10	10	10
Mean	79.45	82.49	81.07	80.12					Mean	79.44	82.41	81.29	79.99
SEM	0.0619139	0.0657436	0.22561	0.0963789					SEM	0.0653197	0.11299	0.187646	0.117804
One-way anova									One-way anova
F=101.694	p<0.001								F=107.612	p<0.001
Games-Howell's test									Bonferroni test
	Significant	Summary	P Value							Significant	Summary	P Value
Sham vs. ICH+Vehicle(DMSO)	Yes	***	<0.001						Sham vs. ICH+Vehicle(DMSO)	Yes	***	<0.001
Sham vs. ICH+TubA(25mg/kg)	Yes	***	<0.001						Sham vs. ICH+TubA(25mg/kg)	Yes	***	<0.001
Sham vs. ICH+TubA(40mg/kg)	Yes	***	<0.001						Sham vs. ICH+TubA(40mg/kg)	Yes	*	0.027
ICH+Vehicle(DMSO) vs. ICH+TubA(25mg/kg)	Yes	###	<0.001						ICH+Vehicle(DMSO) vs. ICH+TubA(25mg/kg)	Yes	###	<0.001
ICH+Vehicle(DMSO) vs. ICH+TubA(40mg/kg)	Yes	###	<0.001						ICH+Vehicle(DMSO) vs. ICH+TubA(40mg/kg)	Yes	###	<0.001
ICH+TubA(25mg/kg) vs. ICH+TubA(40mg/kg)	Yes	^	0.01						ICH+TubA(25mg/kg) vs. ICH+TubA(40mg/kg)	Yes	^^^	<0.001
	Sham	ICH+Vehicle	ICH+TubA(25mg/kg)	ICH+TubA(40mg/kg)						Sham	ICH+Vehicle	ICH+TubA(25mg/kg)	ICH+TubA(40mg/kg)
BWC(24h, Ipsi-CX)	79.8	80	79.7	79.4					BWC(72h, Ipsi-CX)	79.4	79.7	79.4	78.5
	79.5	79.9	79.7	79.7						78.9	79.2	79.7	79.8
	79.5	79.6	79.8	79.5						79.6	79.6	79.3	79.1
	79.6	79.3	79.4	79.6						79.6	79.3	79.8	79.4
	79.3	79.5	79.2	79.8						79.3	79.4	79.6	79.2
	79.5	79.7	79.5	79.2						79.5	79.6	79.3	78.8
	79.4	79.6	79.2	79.3						79.8	79.2	79.4	79.6
	79.3	79.4	79.3	79.6						79.2	79.8	79.5	79.3
	79.6	79.4	79.5	79.1						79.1	79.4	79.6	79.5
	79.2	79.5	79.6	79.7						79.3	79.3	79.1	79.3
N	10	10	10	10					N	10	10	10	10
Mean	79.47	79.59	79.49	79.49					Mean	79.37	79.45	79.47	79.25
SEM	0.0558768	0.0706321	0.0674125	0.0737112					SEM	0.0843933	0.067082	0.06675	0.120416
One-way anova									One-way anova
F=0.649	p=0.589								F=1.304	p=0.288
	Sham	ICH+Vehicle	ICH+TubA(25mg/kg)	ICH+TubA(40mg/kg)						Sham	ICH+Vehicle	ICH+TubA(25mg/kg)	ICH+TubA(40mg/kg)
BWC(24h, Cont-BG)	79.5	79.2	79.3	79.2					BWC(72h, Cont-BG)	78.8	79.5	79.7	78.3
	79.4	79.1	79.4	79.3						79.5	78.7	79.4	79
	79.6	79.4	79.6	79.5						78.7	79.6	78.6	79.3
	79.9	79.5	79.3	79.3						78.8	79.4	79.4	79.3
	79.8	79.6	79.4	79.6						79.4	79.3	79.7	79.5
	79.5	79.3	79.7	79.5						79.2	79.7	79.5	79.6
	79.3	79.3	79.5	79.4						79.5	79.3	79.2	79.7
	79.6	79.5	79.2	79.1						79.3	79.6	79.2	78.7
	79.4	79.6	79.6	79.4						79.4	78.9	79.3	79.2
	79.7	79.7	79.6	79.8						79.2	79.5	79.5	79.4
N	10	10	10	10					N	10	10	10	10
Mean	79.57	79.42	79.46	79.41					Mean	79.18	79.35	79.35	79.2
SEM	0.0597216	0.061101	0.0520683	0.0640312					SEM	0.0963789	0.101379	0.100277	0.13581
One-way anova									One-way anova
F=1.521	p=0.226								F=0.716	p=0.549
	Sham	ICH+Vehicle	ICH+TubA(25mg/kg)	ICH+TubA(40mg/kg)						Sham	ICH+Vehicle	ICH+TubA(25mg/kg)	ICH+TubA(40mg/kg)
BWC(24h, Cont-CX)	79.5	79.6	79.5	79.6					BWC(72h, Cont-CX)	81	78.8	78.4	79.3
	79.3	79.5	79.4	79.2						79.7	79.6	79.6	78.6
	79.6	79.8	79.7	79.5						79.3	79.9	79.5	79.5
	79.4	79.5	79.4	79.8						79.5	79.6	78.9	79.2
	79.4	79.2	79.8	79.6						79.3	79.5	78.8	79.3
	79.8	79.1	79.2	79.1						79.8	79.2	79.6	79.8
	79.6	79.3	79.7	79.5						79.4	79.7	79.7	79.5
	79.3	79.3	79.3	79.2						79.2	79.1	79.6	79.1
	79.5	79.4	79.6	79.4						79.6	79.2	79.5	78.9
	79.6	79.6	79.5	79.5						79.3	79.8	79.2	79.4
N	10	10	10	10					N	10	10	10	10
Mean	79.5	79.43	79.51	79.44					Mean	79.61	79.44	79.28	79.26
SEM	0.0494413	0.06675	0.0604612	0.0686375					SEM	0.1663	0.110755	0.138884	0.106667
One-way anova									One-way anova
F=0.437	p=0.728								F=1.505	p=0.23
	Sham	ICH+Vehicle	ICH+TubA(25mg/kg)	ICH+TubA(40mg/kg)						Sham	ICH+Vehicle	ICH+TubA(25mg/kg)	ICH+TubA(40mg/kg)
BWC(24h, Cerebel)	78.2	78.6	78.1	78.4					BWC(24h, Cerebel)	77.9	78.2	77.6	78.4
	78.9	78.5	78.5	78.7						78.3	78.5	78.8	78.2
	78.4	78.5	78.3	78.3						78.5	78.6	78.6	78.6
	78.5	78.3	78.8	78.9						78.8	77.9	77.6	78.4
	78.2	78.4	78.2	78.6						78.2	78.7	77.8	77.9
	78.3	78.2	78.2	78.3						78.4	78.2	78.5	78.2
	78.5	78.7	78.4	78.2						78	78.4	78.3	78.7
	78.8	78.8	78.6	78.4						77.9	78.5	78.1	78.5
	78.1	78.3	78.4	78.5						78.1	77.8	78.7	77.8
	78.2	78.9	78.7	78.4						77.7	78.2	78.4	78.4
N	10	10	10	10					N	10	10	10	10
Mean	78.41	78.52	78.42	78.47					Mean	78.18	78.3	78.24	78.31
SEM	0.0849183	0.0727248	0.0727248	0.06675					SEM	0.104137	0.0930949	0.140791	0.0912262
One-way anova									One-way anova
F=0.462	p=0.711								F=0.304	p=0.822
Figure 6
	Sham	ICH+Vehicle	ICH+TubA(25mg/kg)	ICH+TubA(40mg/kg)
Tunel, apoptosis cells(%)	0	52.63	15	7.14
	3.22	50	20	8.33
	0	45.83	19.23	12
N	3	3	3	3
Mean	1.07333	49.4867	18.0767	9.15667
SEM	1.07333	1.9797	1.55431	1.46258
One-way anova
F=186.675	p<0.001
Bonferroni test
	Significant	Summary	P Value
Sham vs. ICH+Vehicle(DMSO)	Yes	***	<0.001
Sham vs. ICH+TubA(25mg/kg)	Yes	***	<0.001
Sham vs. ICH+TubA(40mg/kg)	Yes	*	0.037
ICH+Vehicle(DMSO) vs. ICH+TubA(25mg/kg)	Yes	###	<0.001
ICH+Vehicle(DMSO) vs. ICH+TubA(40mg/kg)	Yes	###	<0.001
ICH+TubA(25mg/kg) vs. ICH+TubA(40mg/kg)	Yes	^	0.022
Figure 7
	Control	Hemin+Vehicle(PBS)	Hemin+TubA	Hemin+NC-siRNA	Hemin+HDAC6siRNA
cytometric analyses, apoptosis cells(%)	2.37	16.02	12.2	15.56	9.19
	2.41	15.04	12.24	16.12	9.63
	2.34	15.63	12.64	16.17	9.38
N	3	3	3	3	3
Mean	2.37333	15.5633	12.36	15.95	9.4
SEM	0.0202759	0.284859	0.140475	0.195533	0.12741
One-way anova
F=995.726	p<0.001
Bonferroni test
	Significant	Summary	P Value
Cont vs. Hemin+Vehicle(PBS)	Yes	***	<0.001
Cont vs. Hemin+TubA	Yes	***	<0.001
Cont vs. Hemin+NC-siRNA	Yes	***	<0.001
Cont vs. Hemin+HDAC6 siRNA	Yes	***	<0.001
Hemin+Vehicle(PBS) vs. Hemin+TubA	Yes	###	<0.001
Hemin+Vehicle(PBS) vs. Hemin+NC-siRNA	No	ns	1
Hemin+Vehicle(PBS) vs. Hemin+HDAC6 siRNA	Yes	###	<0.001
Hemin+TubA vs. Hemin+NC-siRNA	Yes	^^^	<0.001
Hemin+TubA vs. Hemin+HDAC6 siRNA	Yes	^^^	<0.001
Hemin+NC-siRNA vs. Hemin+HDAC6 siRNA	Yes	+++	<0.001
Figure 8
	Sham	ICH+Vehicle	ICH+TubA(25mg/kg)	ICH+TubA(40mg/kg)						Sham	ICH+Vehicle	ICH+TubA(25mg/kg)	ICH+TubA(40mg/kg)
HDAC6/β-actin	0.11	0.23	0.18	0.15					Ace-α-tubulin/β-actin	0.15	0.03	0.09	0.11
	0.11	0.28	0.22	0.14						0.18	0.04	0.08	0.11
	0.08	0.28	0.2	0.14						0.24	0.06	0.1	0.13
N	3	3	3	3					N	3	3	3	3
Mean	0.1	0.263333	0.2	0.143333					Mean	0.19	0.0433333	0.09	0.116667
SEM	0.01	0.0166667	0.011547	0.00333333					SEM	0.0264575	0.00881917	0.0057735	0.00666667
One-way anova									One-way anova
F=38.411	p<0.001								F=17.593	p=0.001
Bonferroni test									Bonferroni test
	Significant	Summary	P Value							Significant	Summary	P Value
Sham vs. ICH+Vehicle(DMSO)	Yes	***	<0.001						Sham vs. ICH+Vehicle(DMSO)	Yes	**	0.001
Sham vs. ICH+TubA(25mg/kg)	Yes	**	0.002						Sham vs. ICH+TubA(25mg/kg)	Yes	**	0.008
Sham vs. ICH+TubA(40mg/kg)	No	ns	0.167						Sham vs. ICH+TubA(40mg/kg)	Yes	*	0.045
ICH+Vehicle(DMSO) vs. ICH+TubA(25mg/kg)	Yes	#	0.027						ICH+Vehicle(DMSO) vs. ICH+TubA(25mg/kg)	No	ns	0.324
ICH+Vehicle(DMSO) vs. ICH+TubA(40mg/kg)	Yes	###	<0.001						ICH+Vehicle(DMSO) vs. ICH+TubA(40mg/kg)	Yes	#	0.045
ICH+TubA(25mg/kg) vs. ICH+TubA(40mg/kg)	Yes	^	0.048						ICH+TubA(25mg/kg) vs. ICH+TubA(40mg/kg)	No	ns	1
	Sham	ICH+Vehicle	ICH+TubA(25mg/kg)	ICH+TubA(40mg/kg)						Sham	ICH+Vehicle	ICH+TubA(25mg/kg)	ICH+TubA(40mg/kg)
Bax/β-actin	0.05	0.36	0.26	0.21					bcl-2/β-actin	0.42	0.07	0.21	0.29
	0.05	0.27	0.2	0.14						0.39	0.12	0.26	0.38
	0.05	0.32	0.22	0.14						0.45	0.08	0.26	0.3
N	3	3	3	3					N	3	3	3	3
Mean	0.05	0.316667	0.226667	0.163333					Mean	0.42	0.09	0.243333	0.323333
SEM	0	0.0260342	0.0176383	0.0233333					SEM	0.0173205	0.0152753	0.0166667	0.02848
One-way anova									One-way anova
F=32.78	p<0.001								F=48.043	p<0.001
Bonferroni test									Bonferroni test
	Significant	Summary	P Value							Significant	Summary	P Value
Sham vs. ICH+Vehicle(DMSO)	Yes	***	<0.001						Sham vs. ICH+Vehicle(DMSO)	Yes	***	<0.001
Sham vs. ICH+TubA(25mg/kg)	Yes	**	0.001						Sham vs. ICH+TubA(25mg/kg)	Yes	**	0.002
Sham vs. ICH+TubA(40mg/kg)	Yes	*	0.021						Sham vs. ICH+TubA(40mg/kg)	No	ns	0.057
ICH+Vehicle(DMSO) vs. ICH+TubA(25mg/kg)	No	ns	0.07						ICH+Vehicle(DMSO) vs. ICH+TubA(25mg/kg)	Yes	##	0.004
ICH+Vehicle(DMSO) vs. ICH+TubA(40mg/kg)	Yes	##	0.003						ICH+Vehicle(DMSO) vs. ICH+TubA(40mg/kg)	Yes	###	<0.001
ICH+TubA(25mg/kg) vs. ICH+TubA(40mg/kg)	No	ns	0.309						ICH+TubA(25mg/kg) vs. ICH+TubA(40mg/kg)	No	ns	0.137
	Sham	ICH+Vehicle	ICH+TubA(25mg/kg)	ICH+TubA(40mg/kg)
cleaved caspase-3/β-actin	0.03	0.35	0.29	0.14
	0.04	0.42	0.26	0.16
	0.09	0.4	0.32	0.16
N	3	3	3	3
Mean	0.0533333	0.39	0.29	0.153333
SEM	0.0185592	0.0208167	0.0173205	0.00666667
One-way anova
F=78.429	p<0.001
Bonferroni test
	Significant	Summary	P Value
Sham vs. ICH+Vehicle(DMSO)	Yes	***	<0.001
Sham vs. ICH+TubA(25mg/kg)	Yes	***	<0.001
Sham vs. ICH+TubA(40mg/kg)	Yes	*	0.017
ICH+Vehicle(DMSO) vs. ICH+TubA(25mg/kg)	Yes	#	0.017
ICH+Vehicle(DMSO) vs. ICH+TubA(40mg/kg)	Yes	###	<0.001
ICH+TubA(25mg/kg) vs. ICH+TubA(40mg/kg)	Yes	^^	0.003
Figure 9
	Control	Hemin+Vehicle(PBS)	Hemin+TubA	Hemin+NC-siRNA	Hemin+HDAC6siRNA					Control	Hemin+Vehicle(PBS)	Hemin+TubA	Hemin+NC-siRNA	Hemin+HDAC6siRNA
HDAC6/β-actin	0.12	0.62	0.39	0.6	0.22				Ace-α-tubulin/β-actin	0.25	0.03	0.13	0.03	0.14
	0.1	0.52	0.22	0.5	0.16					0.3	0.04	0.15	0.05	0.17
	0.13	0.61	0.41	0.6	0.35					0.36	0.08	0.17	0.07	0.21
N	3	3	3	3	3				N	3	3	3	3	3
Mean	0.116667	0.583333	0.34	0.566667	0.243333				Mean	0.303333	0.05	0.15	0.05	0.173333
SEM	0.00881917	0.031798	0.0602771	0.0333333	0.0560754				SEM	0.031798	0.0152753	0.011547	0.011547	0.0202759
One-way anova									One-way anova
F=23.017	p<0.001								F=28.578	p<0.001
Bonferroni test									Bonferroni test
	Significant	Summary	P Value							Significant	Summary	P Value
Cont vs. Hemin+Vehicle(PBS)	Yes	***	<0.001						Cont vs. Hemin+Vehicle(PBS)	Yes	***	<0.001
Cont vs. Hemin+TubA	Yes	*	0.039						Cont vs. Hemin+TubA	Yes	**	0.003
Cont vs. Hemin+NC-siRNA	Yes	***	<0.001						Cont vs. Hemin+NC-siRNA	Yes	***	<0.001
Cont vs. Hemin+HDAC6 siRNA	No	ns	0.607						Cont vs. Hemin+HDAC6 siRNA	Yes	**	0.009
Hemin+Vehicle(PBS) vs. Hemin+TubA	Yes	#	0.023						Hemin+Vehicle(PBS) vs. Hemin+TubA	Yes	#	0.048
Hemin+Vehicle(PBS) vs. Hemin+NC-siRNA	No	ns	1						Hemin+Vehicle(PBS) vs. Hemin+NC-siRNA	No	ns	1
Hemin+Vehicle(PBS) vs. Hemin+HDAC6 siRNA	Yes	##	0.002						Hemin+Vehicle(PBS) vs. Hemin+HDAC6 siRNA	Yes	#	0.012
Hemin+TubA vs. Hemin+NC-siRNA	Yes	^	0.036						Hemin+TubA vs. Hemin+NC-siRNA	Yes	^	0.048
Hemin+TubA vs. Hemin+HDAC6 siRNA	No	ns	1						Hemin+TubA vs. Hemin+HDAC6 siRNA	No	ns	1
Hemin+NC-siRNA vs. Hemin+HDAC6 siRNA	Yes	++	0.003						Hemin+NC-siRNA vs. Hemin+HDAC6 siRNA	Yes	+	0.012
	Control	Hemin+Vehicle(PBS)	Hemin+TubA	Hemin+NC-siRNA	Hemin+HDAC6siRNA					Control	Hemin+Vehicle(PBS)	Hemin+TubA	Hemin+NC-siRNA	Hemin+HDAC6siRNA
Bax/β-actin	0.07	0.52	0.3	0.47	0.27				bcl-2/β-actin	0.54	0.11	0.32	0.12	0.48
	0.06	0.46	0.25	0.5	0.18					0.5	0.12	0.39	0.17	0.44
	0.07	0.4	0.24	0.4	0.19					0.48	0.14	0.24	0.15	0.33
N	3	3	3	3	3				N	3	3	3	3	3
Mean	0.0666667	0.46	0.263333	0.456667	0.213333				Mean	0.506667	0.123333	0.316667	0.146667	0.416667
SEM	0.00333333	0.034641	0.0185592	0.0296273	0.02848				SEM	0.0176383	0.00881917	0.0433333	0.0145297	0.0448454
One-way anova									One-way anova
F=43.584	p<0.001								F=30.994	p<0.001
Bonferroni test									Bonferroni test
	Significant	Summary	P Value							Significant	Summary	P Value
Cont vs. Hemin+Vehicle(PBS)	Yes	***	<0.001						Cont vs. Hemin+Vehicle(PBS)	Yes	***	<0.001
Cont vs. Hemin+TubA	Yes	**	0.003						Cont vs. Hemin+TubA	Yes	*	0.012
Cont vs. Hemin+NC-siRNA	Yes	***	<0.001						Cont vs. Hemin+NC-siRNA	Yes	***	<0.001
Cont vs. Hemin+HDAC6 siRNA	Yes	*	0.022						Cont vs. Hemin+HDAC6 siRNA	No	ns	0.596
Hemin+Vehicle(PBS) vs. Hemin+TubA	Yes	##	0.003						Hemin+Vehicle(PBS) vs. Hemin+TubA	Yes	#	0.01
Hemin+Vehicle(PBS) vs. Hemin+NC-siRNA	No	ns	1						Hemin+Vehicle(PBS) vs. Hemin+NC-siRNA	No	ns	1
Hemin+Vehicle(PBS) vs. Hemin+HDAC6 siRNA	Yes	###	<0.001						Hemin+Vehicle(PBS) vs. Hemin+HDAC6 siRNA	Yes	###	<0.001
Hemin+TubA vs. Hemin+NC-siRNA	Yes	^^	0.003						Hemin+TubA vs. Hemin+NC-siRNA	Yes	^	0.025
Hemin+TubA vs. Hemin+HDAC6 siRNA	No	ns	1						Hemin+TubA vs. Hemin+HDAC6 siRNA	No	ns	0.4
Hemin+NC-siRNA vs. Hemin+HDAC6 siRNA	Yes	++	0.001						Hemin+NC-siRNA vs. Hemin+HDAC6 siRNA	Yes	++	0.001
	Control	Hemin+Vehicle(PBS)	Hemin+TubA	Hemin+NC-siRNA	Hemin+HDAC6siRNA
cleaved caspase-3/β-actin	0.08	0.43	0.26	0.41	0.21
	0.09	0.45	0.33	0.43	0.26
	0.07	0.47	0.26	0.44	0.2
N	3	3	3	3	3
Mean	0.08	0.45	0.283333	0.426667	0.223333
SEM	0.0057735	0.011547	0.0233333	0.00881917	0.0185592
One-way anova
F=102.387	p<0.001
Bonferroni test
	Significant	Summary	P Value
Cont vs. Hemin+Vehicle(PBS)	Yes	***	<0.001
Cont vs. Hemin+TubA	Yes	***	<0.001
Cont vs. Hemin+NC-siRNA	Yes	***	<0.001
Cont vs. Hemin+HDAC6 siRNA	Yes	**	0.001
Hemin+Vehicle(PBS) vs. Hemin+TubA	Yes	###	<0.001
Hemin+Vehicle(PBS) vs. Hemin+NC-siRNA	No	ns	1
Hemin+Vehicle(PBS) vs. Hemin+HDAC6 siRNA	Yes	###	<0.001
Hemin+TubA vs. Hemin+NC-siRNA	Yes	^^	0.001
Hemin+TubA vs. Hemin+HDAC6 siRNA	No	ns	0.182
Hemin+NC-siRNA vs. Hemin+HDAC6 siRNA	Yes	+++	<0.001
